# Supplementary material for: Abdominal skin tensile strength in aesthetic and massive weight loss patients and its role in ventral hernia repair
Source: BMC Surg. 2019 Jun 26;19:68. doi: 10.1186/s12893-019-0523-7 (PMC6595693; doi:10.1186/s12893-019-0523-7)
Supplement: Supplementary file 1 — Aesthetic and post-bariatric data. Two sheets with clinical and numerical data collected from both groups of patients. The vertical and horizontal tensile strength tests are identified as MED1, MED2, MED3 and MED4. (XLSX 19 kb) [file 12893_2019_523_MOESM1_ESM.xlsx]

## Sheet: Estéticos
	PRON	DATA	IDA	SEX	ETN	COM	COMQ	MED	TAB	GES	GESQ	EST	CAB	QUA	PES	ALT	IMC	DXG	DXU	DUG	DT	DDISTOT	POSUMB	MAR	DEIAS	ANG	TCC	PERRESSEC	TLL	TCIR	LIPO	BARO	DRE	RETO	HERN	MED1	MED2	MED3	MED4
1	31652034	2015-05-26	39	F	1	1	Hipotireoidismo, HAS	Levotiroxina	2	1	1	1	81	95	64	1.58	25.6369	36	20	18	38	2	0.555556	5	30	151.9	18	0.473684	34	1	1	1	2	1	2	552.4	303.8	541.4	576.6
2	11482770	2015-05-29	27	F	2	1	Asma	Broncodilatador	2	1	3	1	83	100	63	1.57	25.5588	39	20	21	41	2	0.512821	5.5	29	149.7	20	0.487805	33	1	1	1	2	1	2	216.6	405.4	404	418.2
3	32606117	2015-06-11	51	F	2	2	0	0	2	1	1	2	76	95	58	1.58	23.2335	38	18	22	40	2	0.473684	6	33	162	17	0.425	27	2	1	1	2	1	2	426.2	348	591.8	595.4
4	14650630	2015-06-26	37	F	1	2	0	0	2	1	4	1	85	107	72	1.69	25.2092	38	19	24	43	5	0.5	5	38	163	16	0.372093	34	1	1	1	2	1	2	344.4	295.2	478.6	399.6
5	23007524	2015-07-14	43	F	1	2	0	0	2	1	3	1	79	99	59	1.56	24.2439	33	18	18	36	3	0.545455	6	29	160.6	14	0.388889	24	1	2	1	2	1	2	454.6	462.4	547.6	724.6
6	43076688	2015-07-17	35	F	2	2	0	0	2	1	2	1	77	107	73	1.72	24.6755	36	18	23	41	5	0.5	6.5	29	146.9	18	0.439024	31	1	2	1	2	1	2	575.2	409.8	628.6	628.6
7	43192432	2015-07-21	49	F	2	2	0	0	2	1	2	1	89	103	73	1.7	25.2595	40	19	22	41	1	0.475	7.5	32	156.4	19	0.463415	33	1	1	1	2	1	2	426.2	324	718.8	578.2
8	40304620	2015-08-06	49	F	2	1	Hipotireoidismo	Levotiroxina	2	1	2	2	91	93	68	1.59	26.8977	37	21	22	43	6	0.567568	5	30	163.8	21	0.488372	39	1	1	1	1	1	2	525.4	469.4	803.8	704.2
9	38657090	2015-08-11	26	F	2	2	0	0	2	1	1	2	83	106	74	1.66	26.8544	35	19	19	38	3	0.542857	7	34	142.5	16	0.421053	32	1	1	1	1	1	2	518.4	544	871.4	599.2
10	16379969	2015-08-28	35	F	2	2	0	0	2	1	3	1	86	110	82	1.73	27.3982	36	17	22	39	3	0.472222	6	36	152.3	25	0.641026	37	1	1	1	2	1	2	381.6	429.2	596.8	586
11	39678458	2015-09-04	53	F	1	2	0	0	2	1	1	1	85	109	69	1.62	26.2917	36	17	22	39	3	0.472222	6	35	154.1	19	0.487179	31	1	2	1	1	1	2	389	213.2	563	491
12	42380340	2015-10-01	30	F	2	2	0	0	2	1	3	2	89	105	73	1.63	27.4756	39	21	18	39	0	0.538462	5	32	145.8	20	0.512821	35	1	2	1	1	1	2	349.6	302.8	505.2	505
13	42651085	2015-10-19	22	F	1	2	0	0	2	1	1	1	85	113	80	1.69	28.0102	37	16	22	38	1	0.432432	6	33	164.9	21	0.552632	33	1	2	1	1	1	2	220.8	295.8	514.4	481.4
14	42983304	2015-10-21	27	F	2	2	0	0	2	1	2	1	81	97	60	1.58	24.0346	36	20	17	37	1	0.555556	6	31	144.7	22	0.594595	33	1	1	1	1	1	2	371	341.4	706.8	589.2
15	1213458	2015-10-23	36	F	2	1	Depressão	Fluoxetina	2	1	4	2	88	98	66	1.59	26.1066	34	14	22	36	2	0.411765	7	31	152.2	20	0.555556	30	1	1	1	1	1	2	301.8	402	476	548.2

## Sheet: Bariátricos
	PRON	DATA	IDA	SEX	ETN	COM	COMQ	MED	TAB	GES	GESQ	EST	TEMPO	CAB	QUA	PES	PICO	PERCPES	ALT	IMC	DXU	DUG	DXG	DT	DDISTOT	POSUMB	MAR	DEIAS	ANG	TCCC	TCCL	PERESSEC	TLL	TCIR	LIPO	BARO	DRE	RETO	HERN	MED1	MED2	MED3	MED4
1	35495227	2015-06-09	51	F	1	1	DM, HAS, DRGE	Glifage, Omeprazol, Vitaminas	2	1	3	2	30	115	147	104	129	0.193798	1.68	36.8481	26	26	46	52	6	0.565217	6	56	180	60	22	0.423077	71	1	2	1	1	1	2	394	499.4	598	339
2	37468871	2015-06-12	38	F	1	2	0	AC injetavel	2	1	3	2	20	88	102	67	114	0.412281	1.64	24.9108	19	25	37	44	7	0.513514	5	33	148.2	40	20	0.454545	44	1	2	1	1	1	2	298.6	420.8	510.8	389.6
3	34810110	2015-06-30	30	F	1	2	0	0	2	0	0	1	18	79	112	79	155	0.490323	1.68	27.9904	16	24	31	40	9	0.516129	4	34	164.4	46	22	0.55	50	1	2	1	1	1	1	511.4	326.8	575	848.8
4	14597195	2015-07-07	47	F	1	2	0	0	2	1	3	2	24	91	103	75	138	0.456522	1.54	31.6242	15	25	36	40	4	0.416667	5	33	154.1	45	21	0.525	36	1	2	1	1	1	1	243.4	339.2	544	451
5	39758214	2015-07-10	53	F	1	1	HAS, AVC	HCTZ, atenolol, anlodipina, FeSO4, AAS, enalapril, vitaminas	2	1	6	1	60	110	130	98	170	0.423529	1.64	36.4366	24	20	33	44	11	0.727273	5	30	173	62	29	0.659091	68	1	2	1	1	1	1	366.4	386	372	485.6
6	38116731	2015-08-14	43	F	1	1	Hipotireoidismo	Tiroxina	3	1	5	1	24	75	105	74	120	0.383333	1.67	26.5338	19	24	39	43	4	0.487179	5	30	139	39	16	0.372093	38	1	2	1	2	1	2	484.8	447	631.4	627
7	3633659	2015-09-08	62	F	1	2	0	0	3	1	2	1	36	86	110	65	119	0.453782	1.52	28.1337	22	28	36	50	14	0.611111	6.5	32	180	49	21	0.42	64	1	2	2	1	1	1	545.8	284	583.2	450.4
8	17708818	2015-09-11	40	F	1	2	0	0	2	1	3	1	72	96	100	72	129	0.44186	1.62	27.4348	20	29	42	49	7	0.47619	4	33	166.5	62	31	0.632653	50	1	2	1	1	1	2	566.6	472.2	604.8	699.8
9	27364461	2015-09-11	49	F	2	1	DM, HAS, DRGE	Metformina, enalapril	3	1	5	1	13	72	91	58	122	0.52459	1.6	22.6562	18	21	36	39	3	0.5	7	23	165	32	14	0.358974	37	1	2	1	1	1	2	514.4	554.8	822.4	879.8
10	35900628	2015-09-22	46	F	1	1	HAS, DRGE	HCTZ, omeprazol, vitaminas	3	0	0	1	44	95	104	78	120	0.35	1.53	33.3205	18	27	40	45	5	0.45	7	37	152.6	43	22	0.488889	47	1	2	1	1	1	2	334.2	341.2	884	742.4
